# Supplementary material
Source: PubMed Central journal article supplement (PMC3423801)
Supplement: supp_mcs142_mcs142supp.pdf [file supp_mcs142_mcs142supp.pdf]

## SUPPLEMENTARY DATA

TABLE S1. Genetic statistics of the 20 microsatellite loci used in the study

| Locus    | Repeat motif | Chromosome number | $N_A$ | $H_E$ |
|----------|--------------|-------------------|-------|-------|
| Satt174  | (ATT)10      | A1                | 11    | 0.817 |
| Satt429  | (ATT)25      | A2                | 23    | 0.894 |
| Sat_128  | (ATT)31      | B1                | 22    | 0.892 |
| Satt556  | (ATT)14      | B2                | 21    | 0.920 |
| Sat_140  | (AT)13       | C1                | 27    | 0.901 |
| Satt227  | (ATT)9       | C2                | 11    | 0.800 |
| Satt179  | (ATT)25      | D1a               | 26    | 0.928 |
| BE021153 | (GT)10       | D1b               | 5     | 0.407 |
| Satt082  | (ATT)13      | D2                | 6     | 0.707 |
| Satt369  | (ATT)17      | E                 | 17    | 0.810 |
| Satt114  | (ATT)17      | F                 | 15    | 0.793 |
| Satt324  | (ATT)19      | G                 | 12    | 0.806 |
| U08405   | (AT)10       | H                 | 16    | 0.754 |
| Satt571  | (ATT)14      | I                 | 21    | 0.913 |
| AW310961 | (ATT)16      | J                 | 21    | 0.911 |
| Satt240  | (ATT)11      | K                 | 12    | 0.770 |
| Satt166  | (ATT)19      | L                 | 19    | 0.814 |
| Satt175  | (ATT)16      | M                 | 18    | 0.902 |
| Sct_195  | (CT)11       | N                 | 6     | 0.783 |
| BE801128 | (CAA)13      | O                 | 8     | 0.736 |
| Overall  |              | 20                | 317   | 0.813 |

$N_A$ : number of detected alleles.  $H_E$ : expected heterozygosity.

FIG. S1. Inference of genetic cluster ( $K$ ) of wild soybean based on the  $\Delta K$  value.  $\Delta K$  value was estimated as per Evanno *et al.* (2005) as a function of  $K$ : (a) for the 40 wild soybean populations from China based on 20 microsatellites; and (b) for representative wild soybean individuals from south China, north-east China, Russian Far East, South Korea and Japan, based on 56 microsatellites.

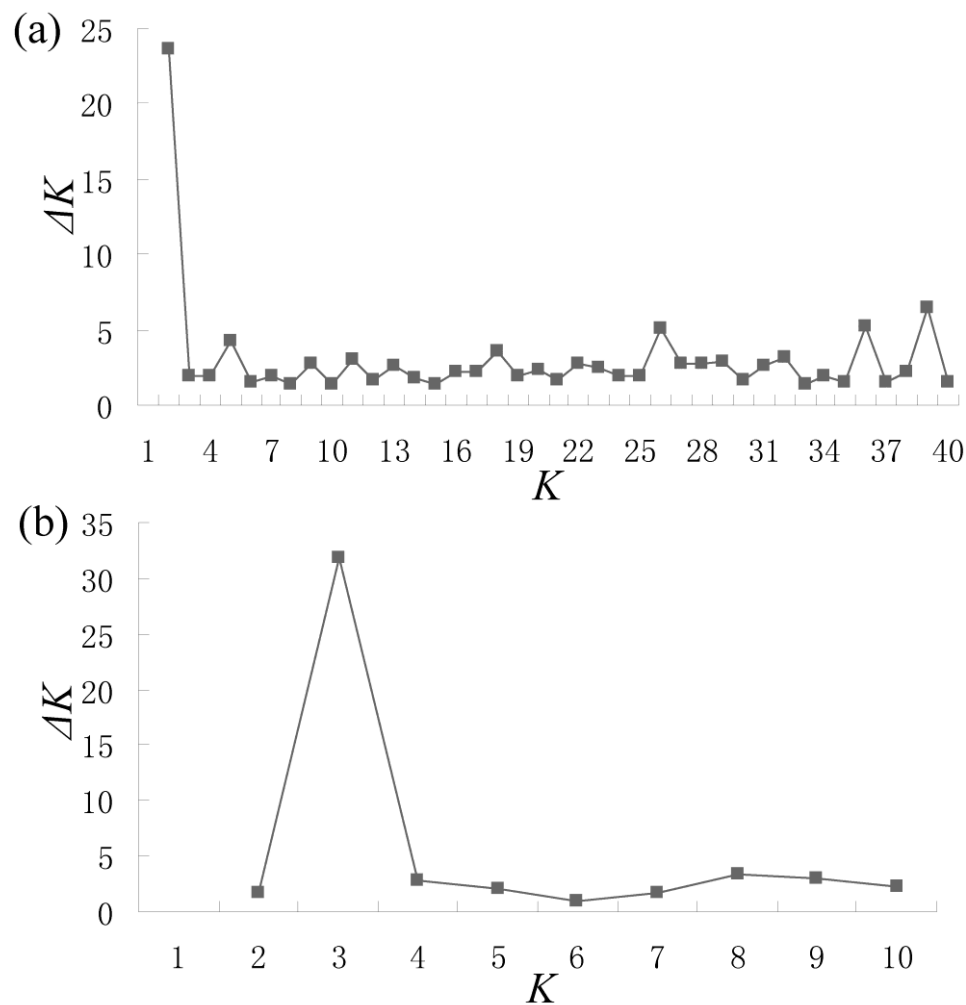

#### REFERENCE

**Evanno G, Regnaut S, Goudet J. 2005.** Detecting the number of the number of clusters of individuals using the software STRUCTURE: a simulation study. *Molecular Ecology* **14**: 2611–2620.
